# Supplementary material for: Flat-optics hybrid MoS2/polymer films for photochemical conversion
Source: Royal Society of Chemistry journal article supplement (doi:10.1039/d2nr05004h), 2022-12-29
Supplement: d2nr05004h1.pdf [file d2nr05004h1.pdf]

# Flat optics Hybrid MoS<sub>2</sub>/polymer films for photochemical conversion

Giulio Ferrando<sup>a</sup>, Matteo Gardella<sup>a</sup>, Giorgio Zambito<sup>a</sup>, Matteo Barelli<sup>a†</sup>, Debasree Chowdhury<sup>a††</sup>,  
Maria Caterina Giordano<sup>a\*</sup>, Francesco Buatier de Mongeot<sup>a\*</sup>

<sup>1</sup> Dipartimento di Fisica, Università di Genova, Via Dodecaneso 33, I-16146 Genova, Italy

<sup>†</sup> Present address: Photonic Nanomaterials Lab, Istituto Italiano di Tecnologia (IIT), 16163 Genova, Italy

<sup>††</sup> Present address: Department of Physics, Bose Institute, 93/1, Acharya Prafulla Chandra Road, Kolkata700009, India

\* To whom correspondence may be addressed: [giordano@fisica.unige.it](mailto:giordano@fisica.unige.it), [buatier@fisica.unige.it](mailto:buatier@fisica.unige.it)

## Supporting information

### Morphological characterization

Here are reported the 2D self-correlation of AFM topographies that are extracted through the WsXM software (Fig. S11a). The period of the lattice  $D$  is obtained by measuring the distance between the maximum and the second peak of the line profile reported in Fig. S11b. The AFM topography of the large area samples is measured at several locations separated macroscopically.

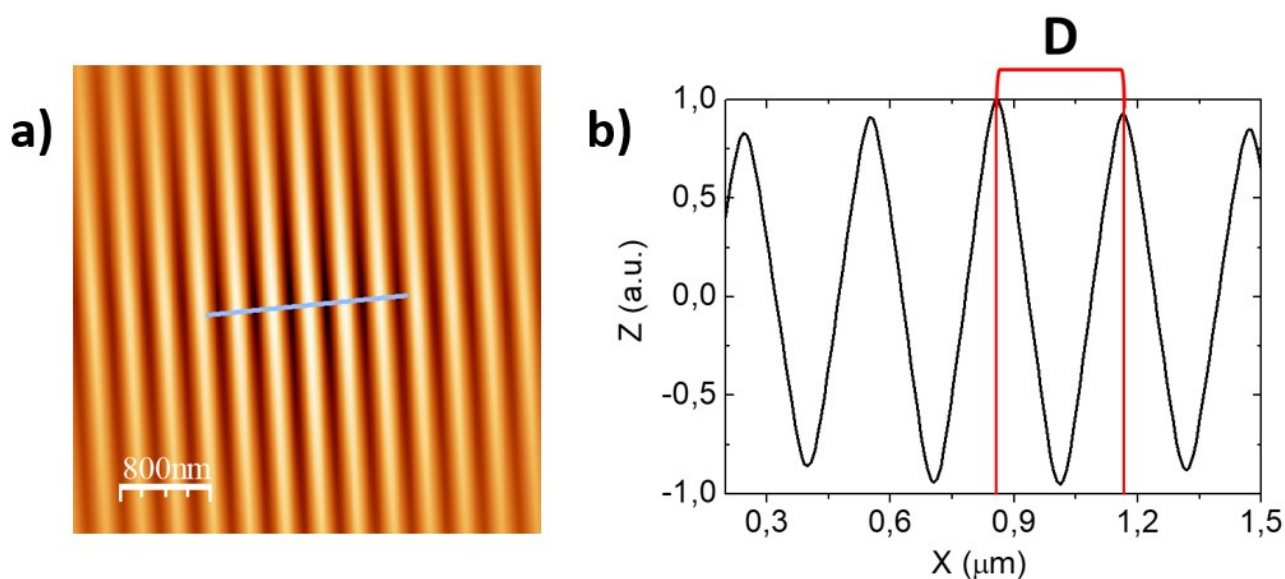

Figure S11 a) 2D autocorrelation function of the AFM topography of Fig.2c of the main manuscript. b) Line profile of the 2D autocorrelation function corresponding to the blue bar in panel a).

## Dependence of optical anomaly wavelength on refractive index of external medium

In figure S12 we show the values of the minima measured in air (black line) and measured in water (red line). From their trend we can see a shift of the wavelength towards red, as expected from the theoretical trend of the Rayleigh Anomaly due to the variation of the refractive index.

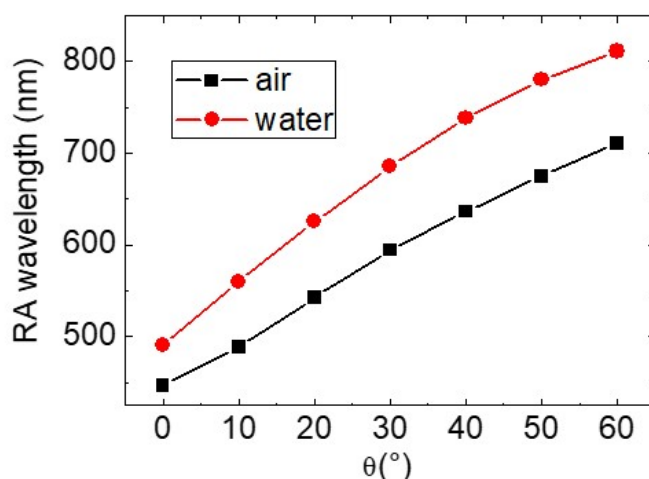

Figure S12 Minima detected in air (red squares) and in water (red circles) for different angles of illumination.

## Angle resolved Optical extinction and photodissociation

Figure S13a shows a picture of the custom-made set-up for the acquisition of angle-resolved transmission spectra both in air and liquid. Specifically, the sample is inserted into a quartz cuvette by means of a system that allows to vary its orientation. The same system has been used during the photocatalytic exposures, as shown in Figure S13b, allowing to vary the illumination angle.

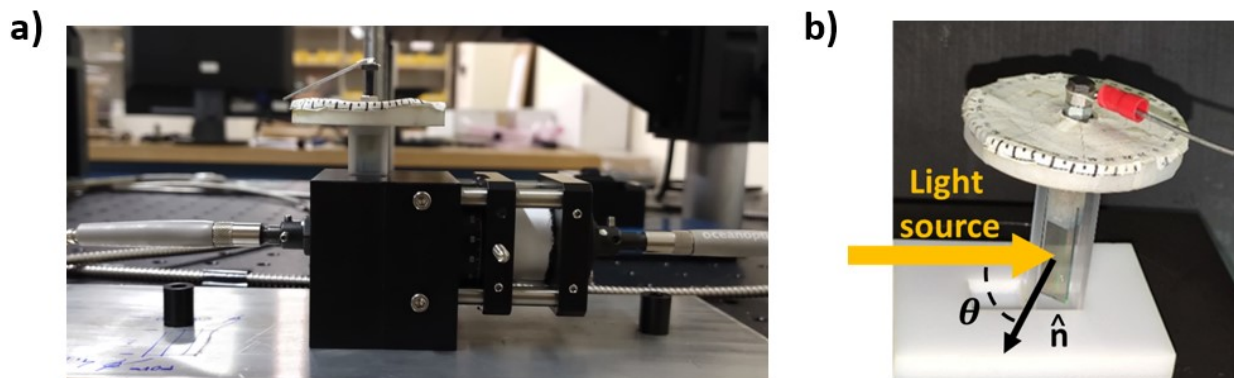

Figure S13 a) Photo of the custom-made set-up for the acquisition of optical spectra with angle-resolved inclination b) photo of the goniometric stage used to vary the orientation of the sample respect to the illumination during the exposure.

## Sample fabrication

Figure S14 shows in a schematic manner the main steps of the nanostructuring process used in the Light Interference Lithography (LIL).

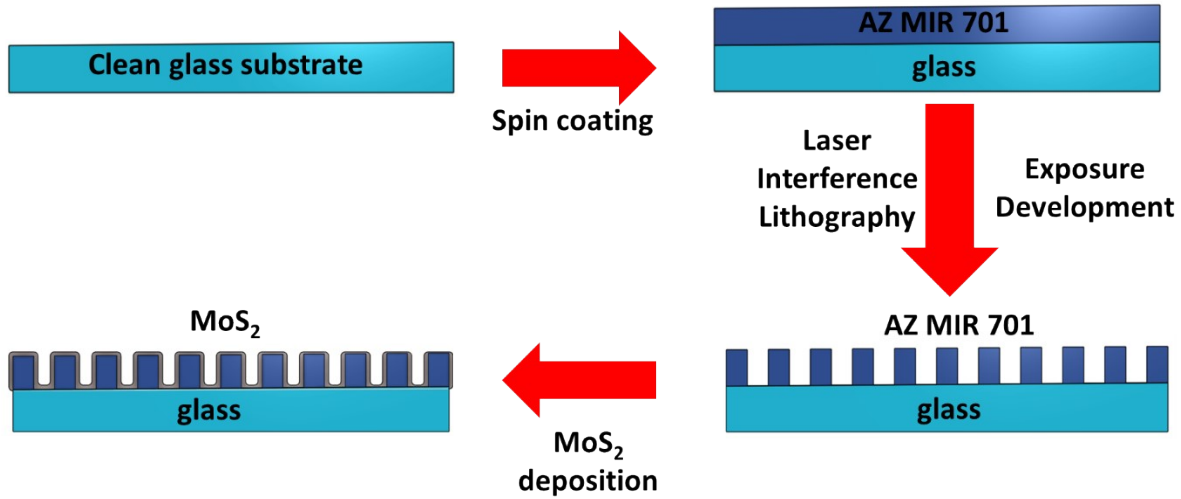

Figure S14 Sketch of surface nanostructuring obtained by Light Interference Lithography (LIL).

## Angle resolved total absorption measurements

A custom-modified optical setup based on a Thorlabs 4P4 integrating sphere has been developed (Fig. S15). A polarized supercontinuum light source has been coupled in free space to the integrating sphere via polarizers and broadband neutral filters. The sample is positioned into the integrating sphere via a custom-developed sample holder that allows the controlled tilting and positioning with respect to the illumination source. This holder has been 3D printed using a white PLA filament. It is thus possible to control the light incidence angle ( $\theta$ ) on the sample, while the outgoing light is coupled to a VIS-NIR optical spectrometer (Ocean Optics HR4000) via optical fiber. The total absorption spectra are evaluated as

$$A(\theta) = 1 - T(\theta) = 1 - \frac{S_{meas}(\theta) - S_{dark}}{S_{ref} - S_{dark}}$$
, where  $S_{dark}$  is the spectrum acquired with the light source off,  $S_{ref}$  the reference spectrum (acquired with light source on and the sample lifted up, so that it doesn't directly intercept the light source) and  $S_{meas}(\theta)$  is the spectrum acquired with the sample intercepting the input light source with an incident angle  $\theta$ . The substitution errors of the integrating sphere, evaluated with respect to a reference non-absorbing substrate, are estimated in the range of 3%. The supercontinuum laser employed for illumination limits the minimum wavelength to about 500 nm.

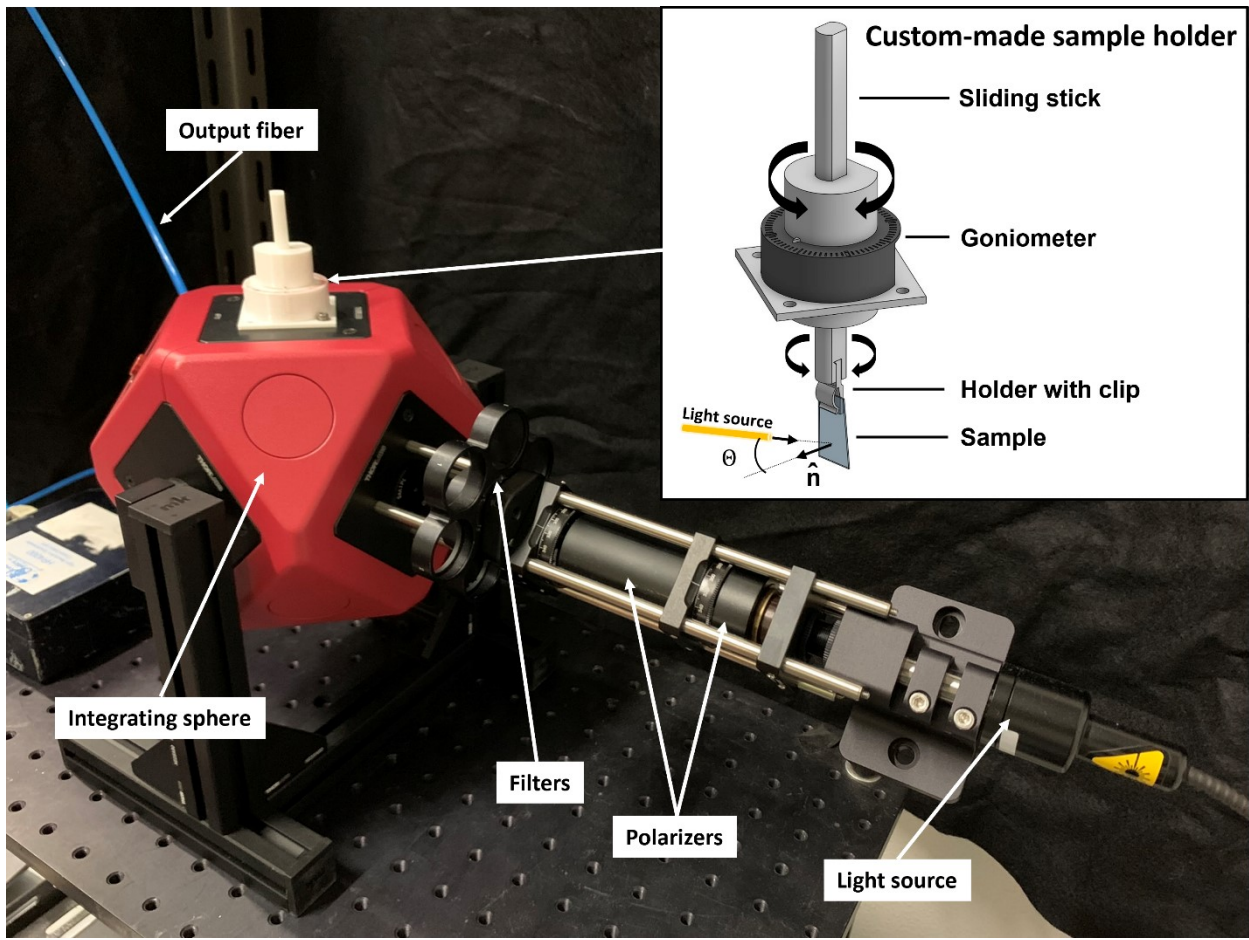

Figure SI5: Custom-made integrating sphere setup for VIS-NIR total absorption measurements.
